# Supplementary material for: p63, a key regulator of Ago2, links to the microRNA-144 cluster
Source: PubMed Central journal article supplement (PMC9033807; doi:10.1038/s41419-022-04854-1), 2022-04-22

Figure 1A

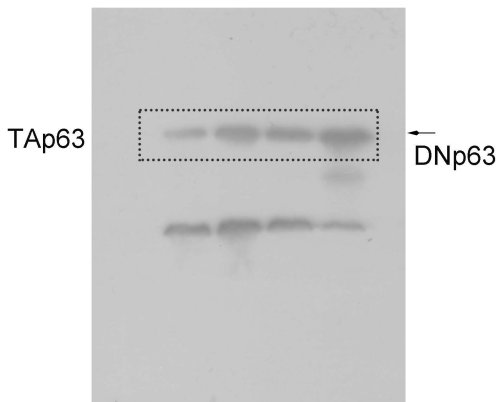

Figure 1B

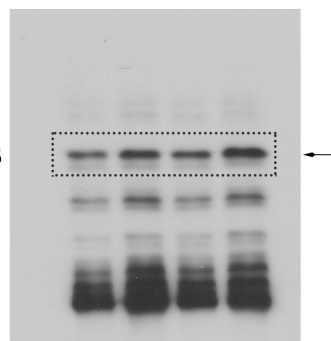

Figure 1F-G

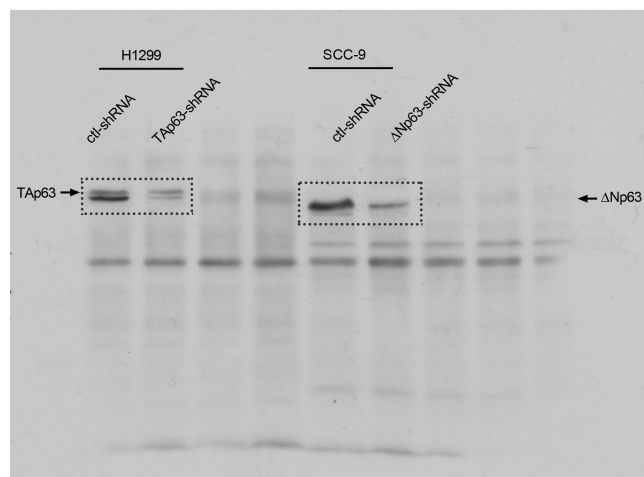

Ago2

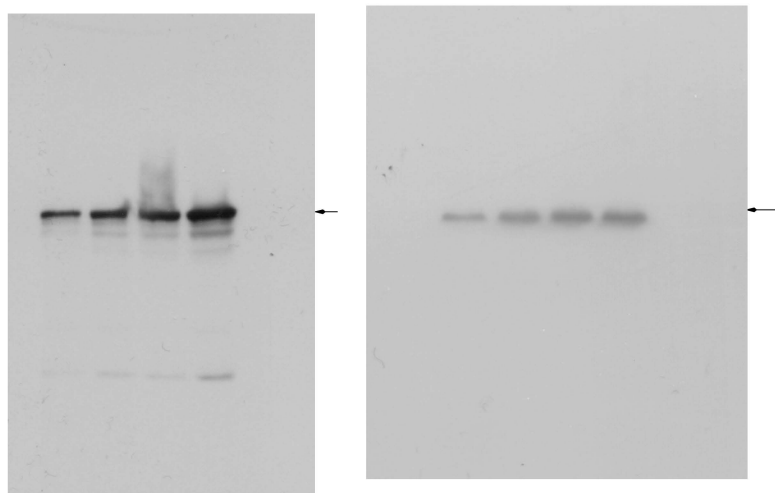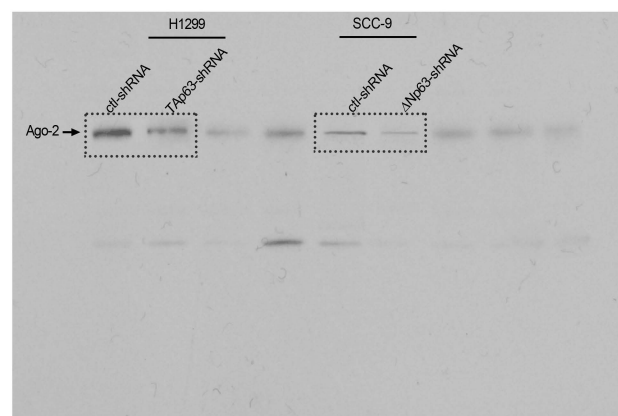

Actin

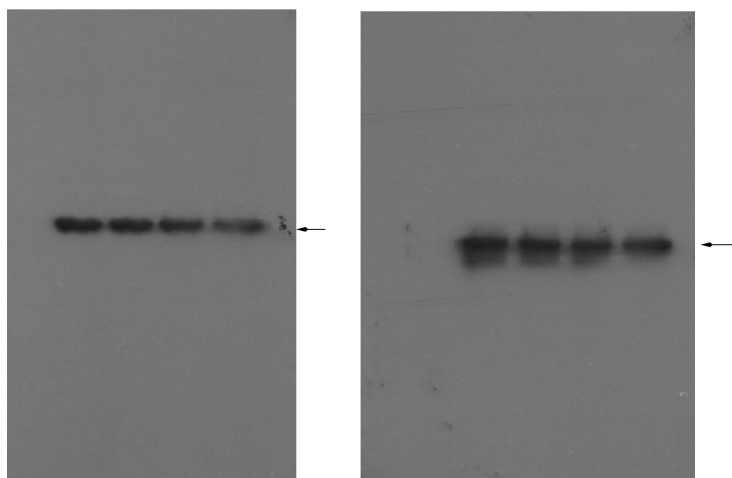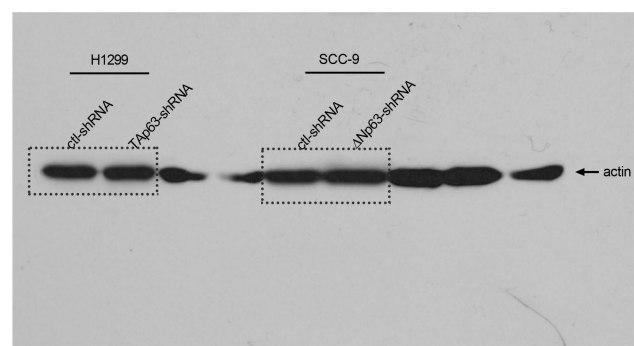

Fig-2A

Fig-2B

Fig-2C

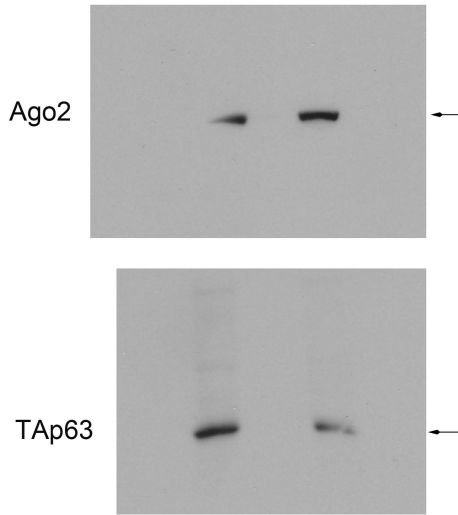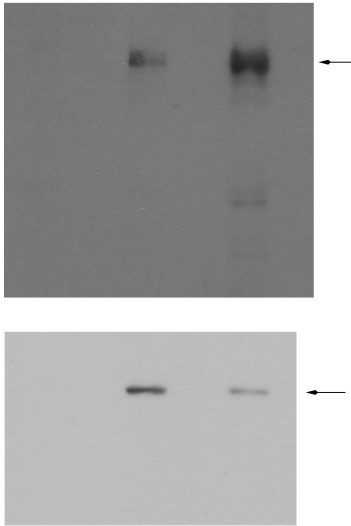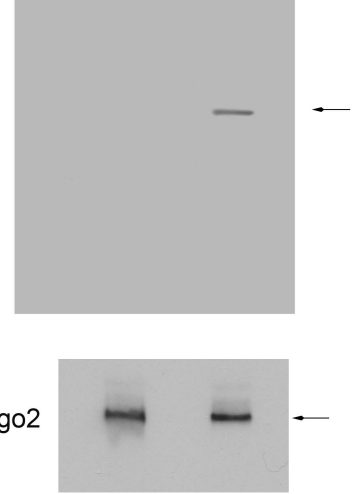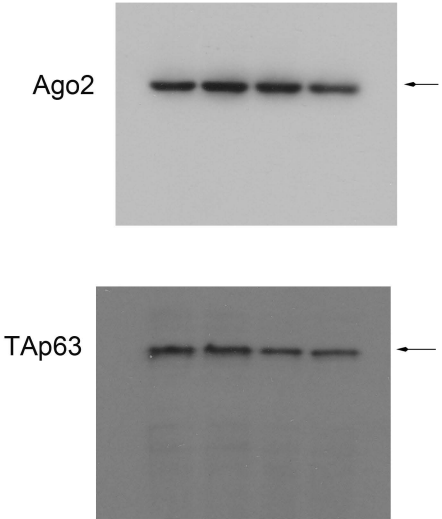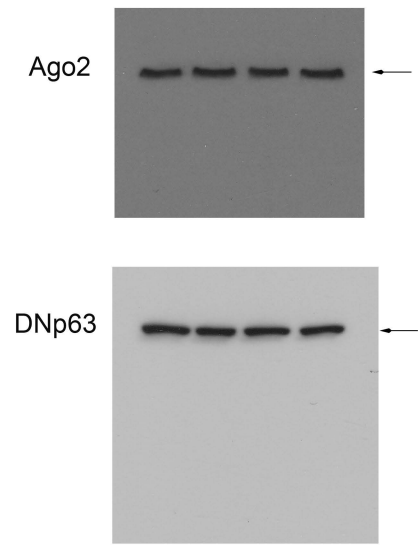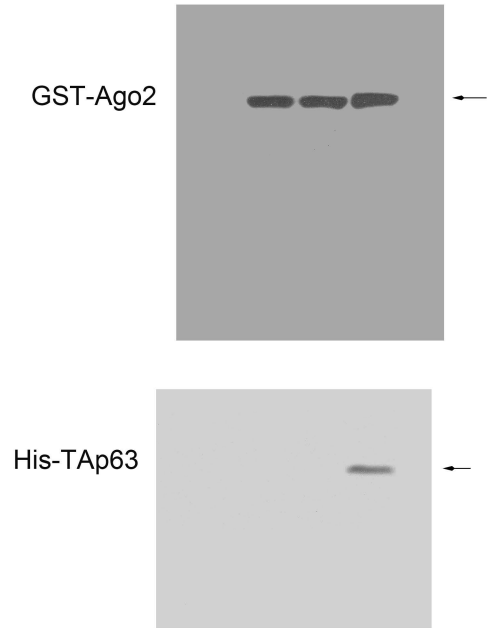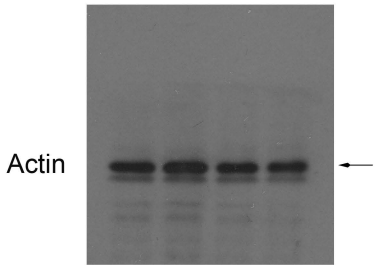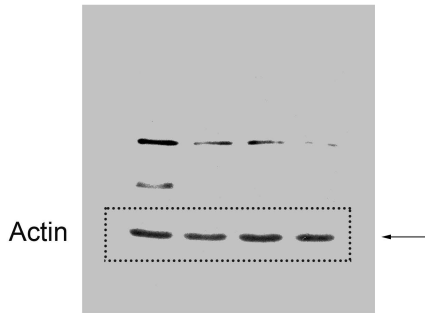



Figure 2G

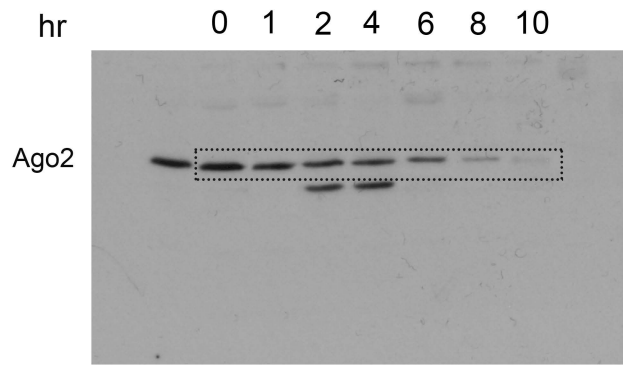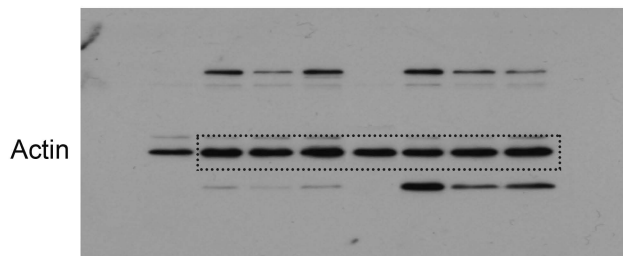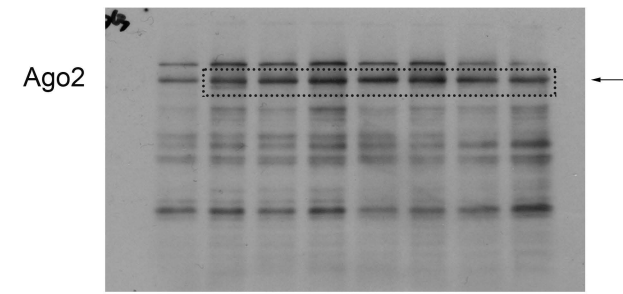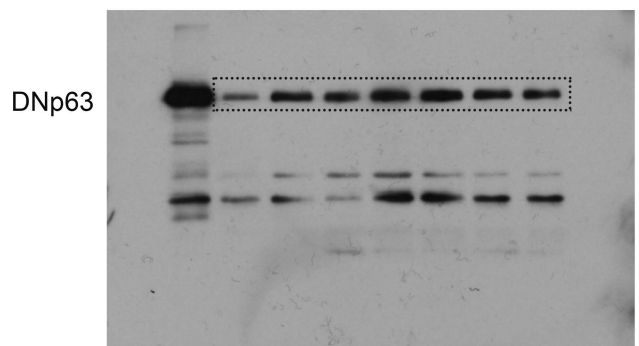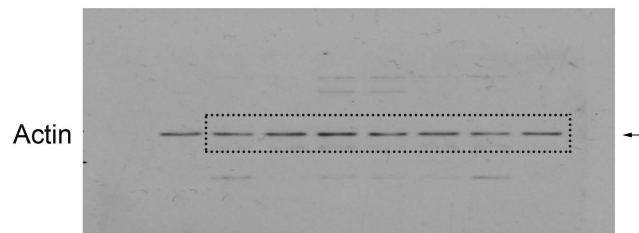

Figure 2H

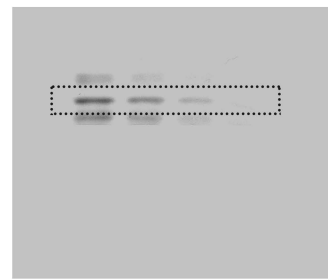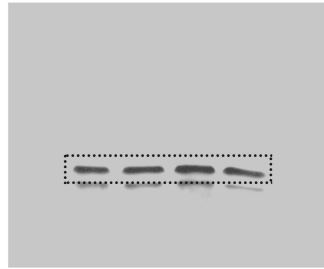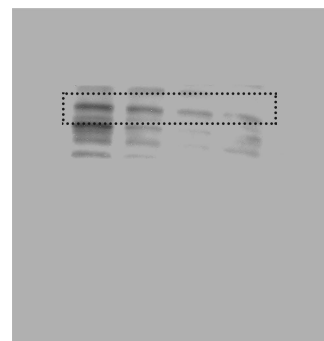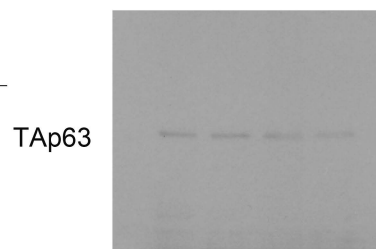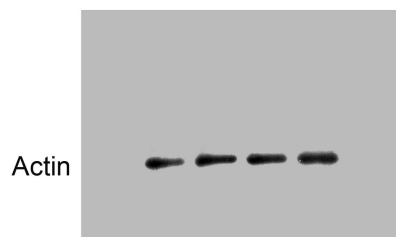

Figure 2I

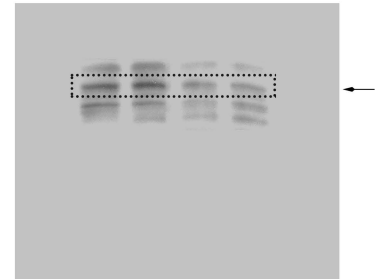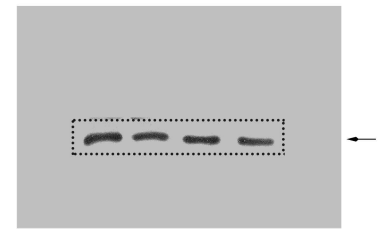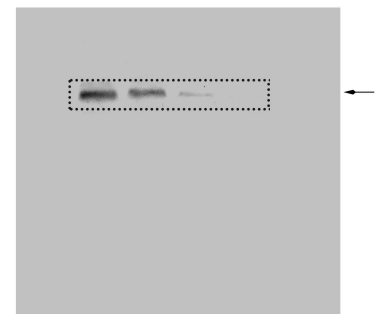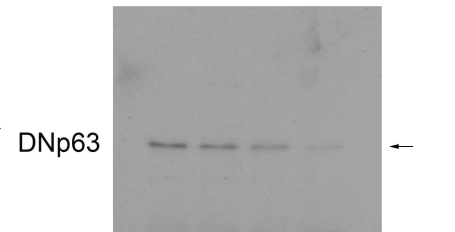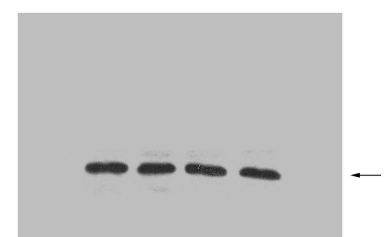

Figure 5D

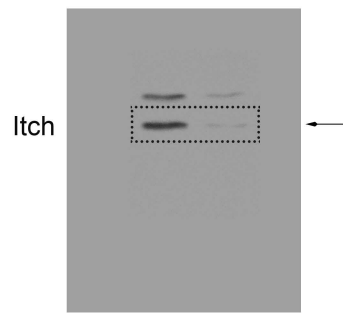

Figure 5E

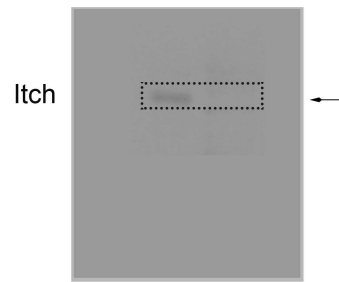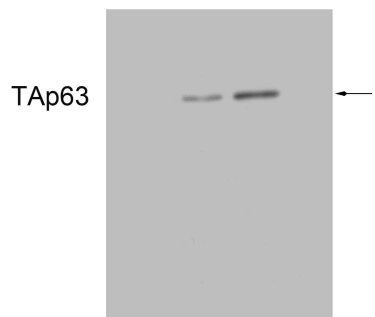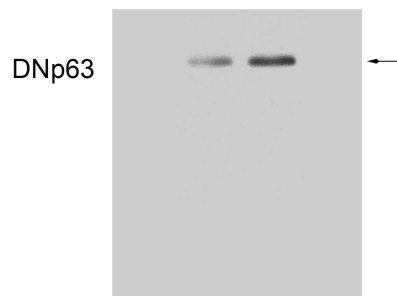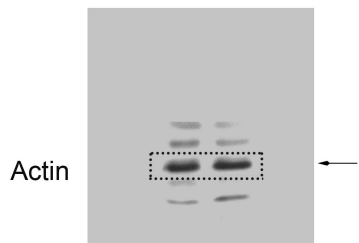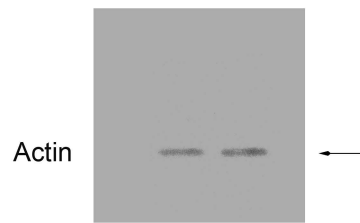

Figure 6C

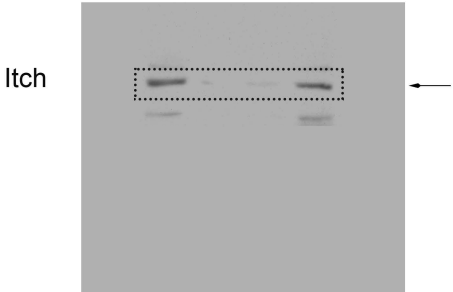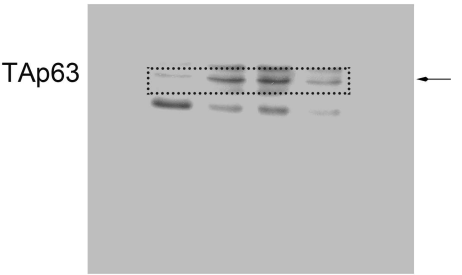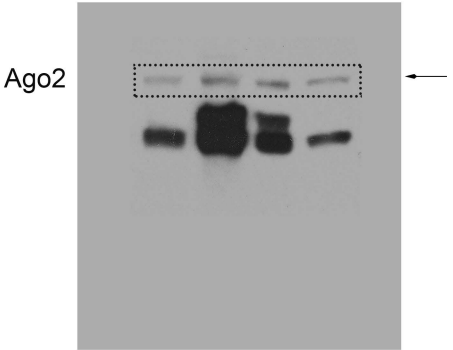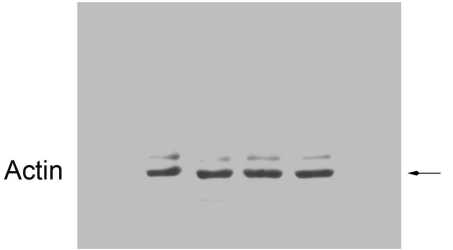

Figure 6D

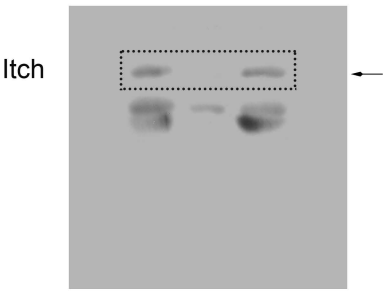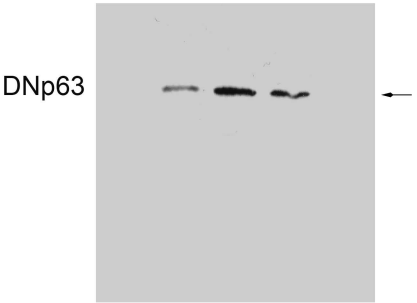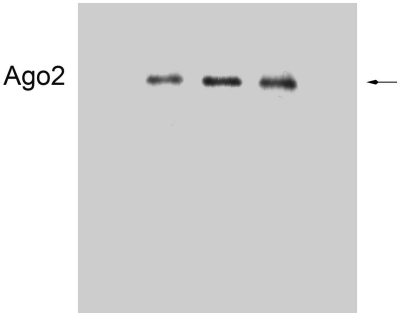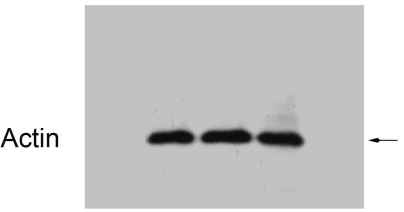

Figure 7F

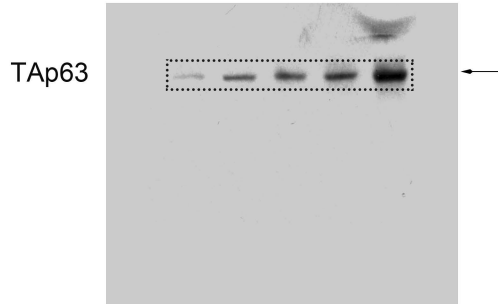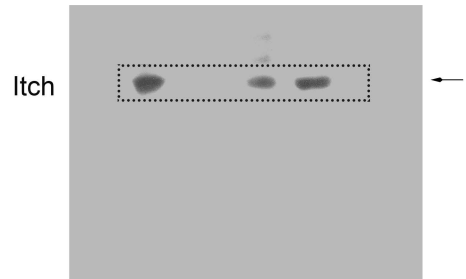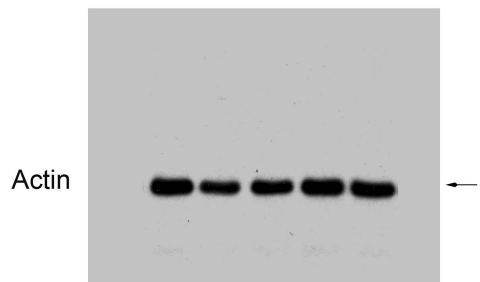

Figure 7G

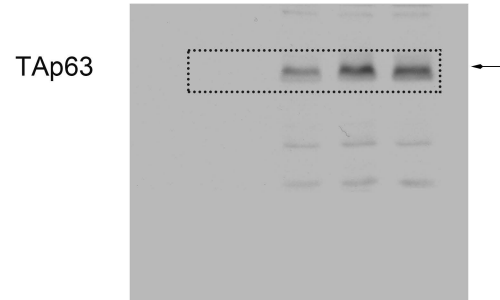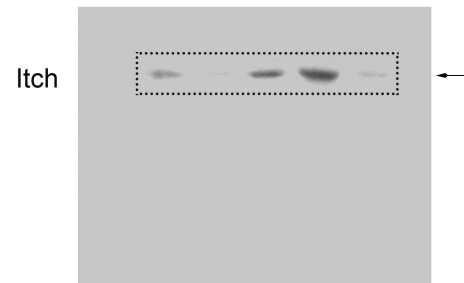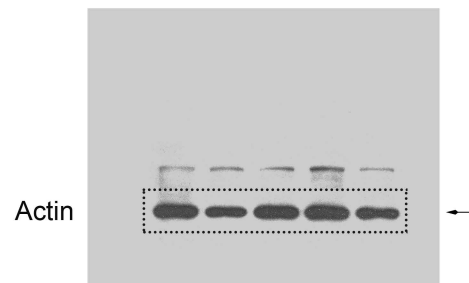

Supplementary Fig-1A

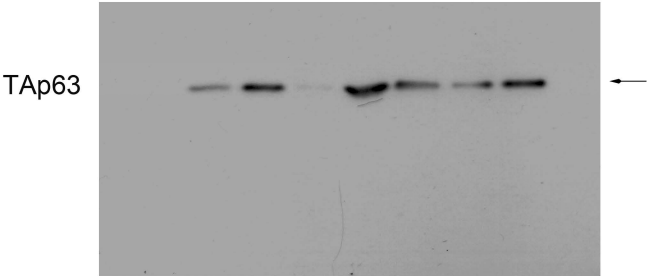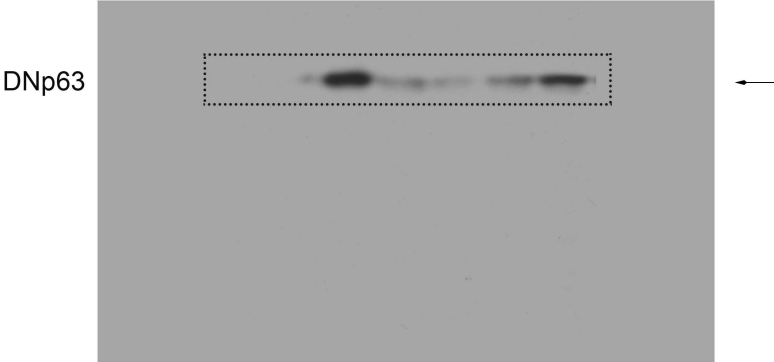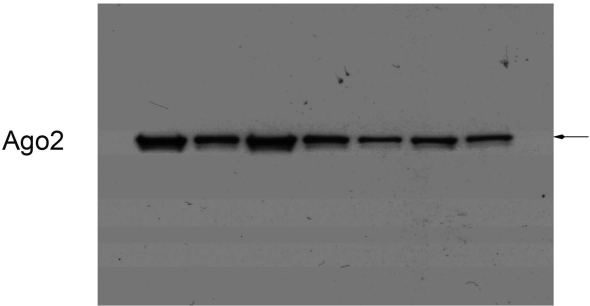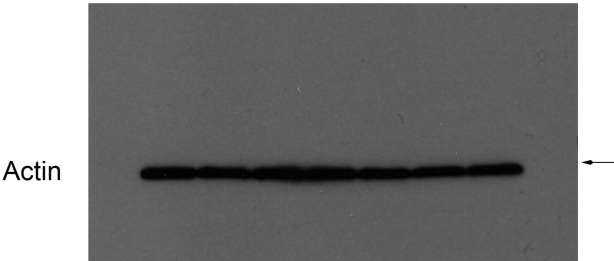



Suppl Fig-2A

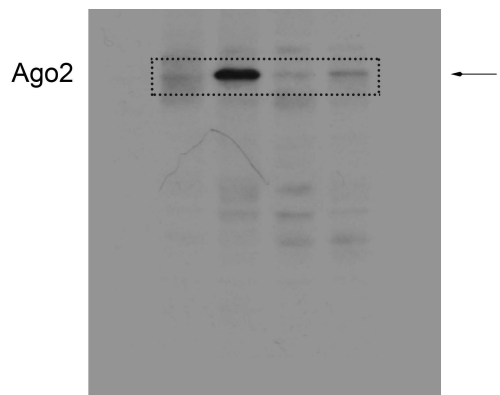

Suppl Fig-2B

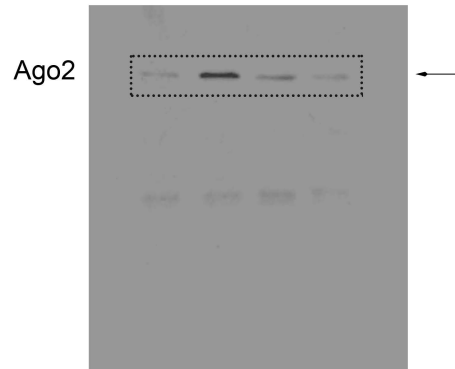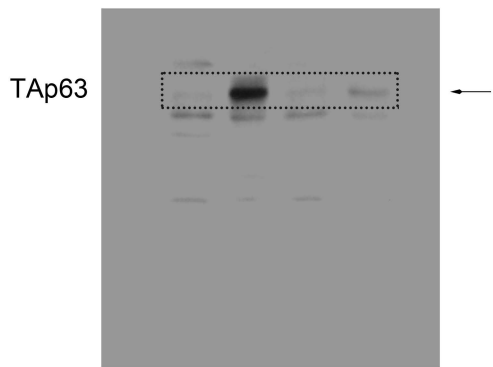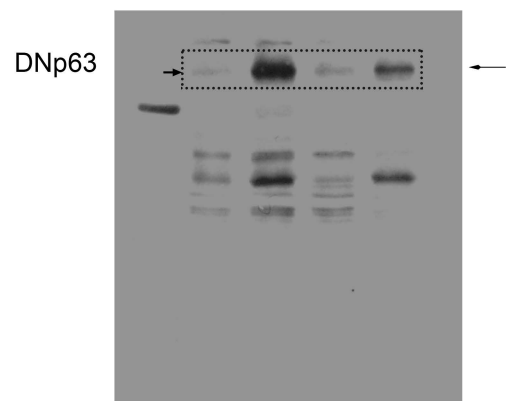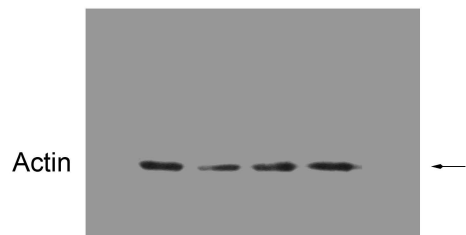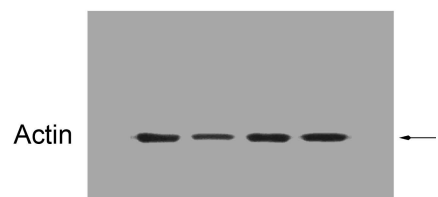

Suppl Fig 4E

Suppl Fig 4F

Suppl Fig 4H

Ago2

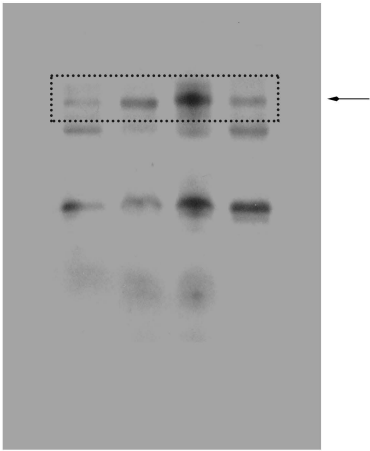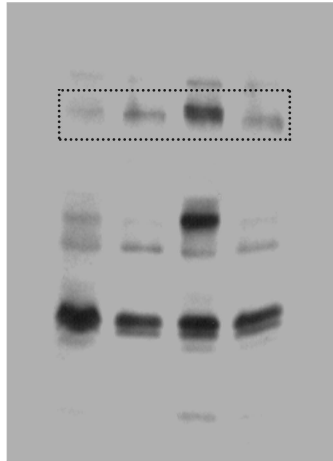

Ago2  
TAp63  
DNp63

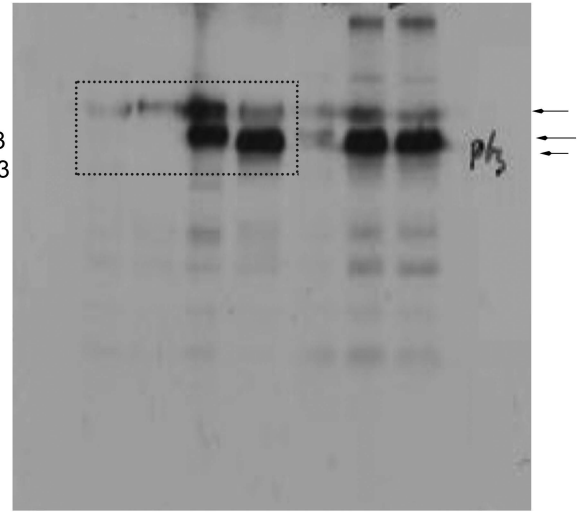

TAp63  
DNp63

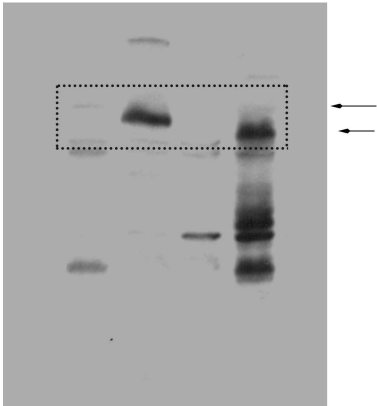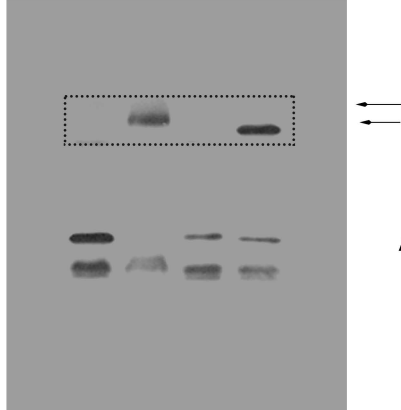

Actin

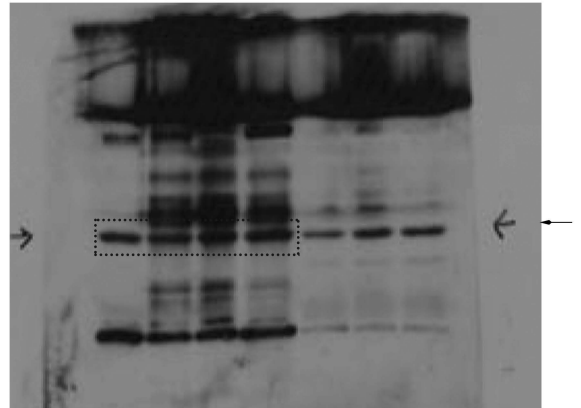

Actin

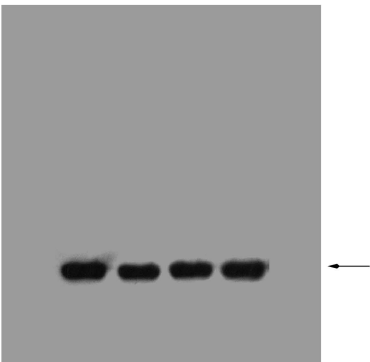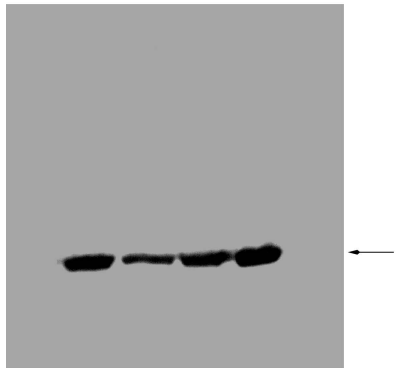

Suppl Fig-5B

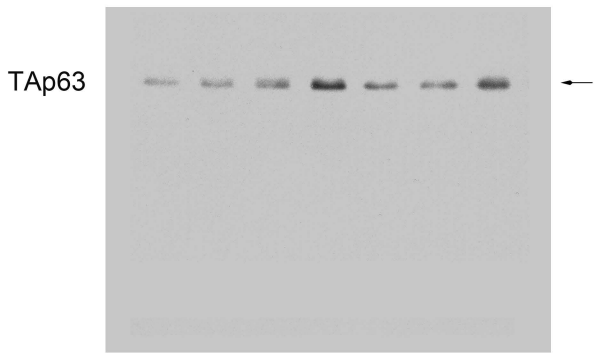

Suppl Fig-5C

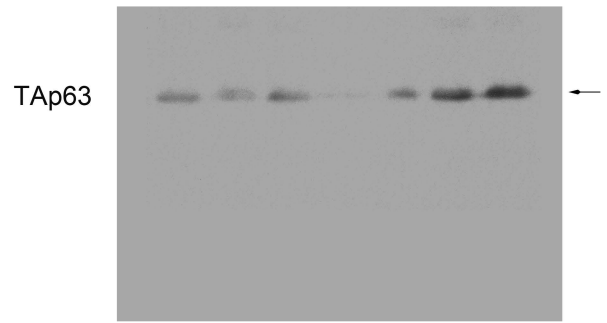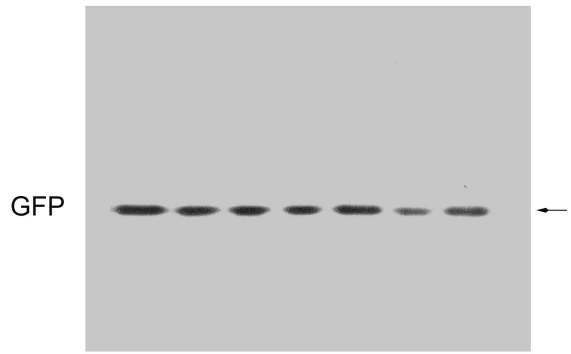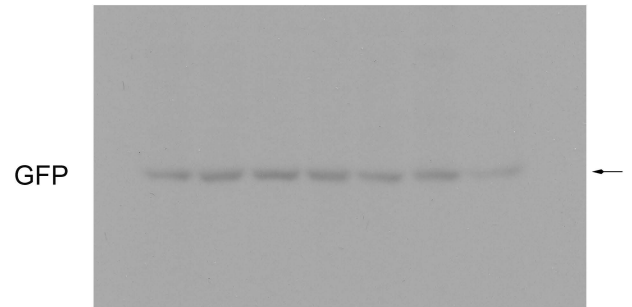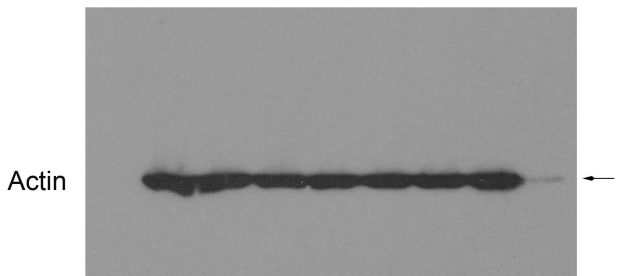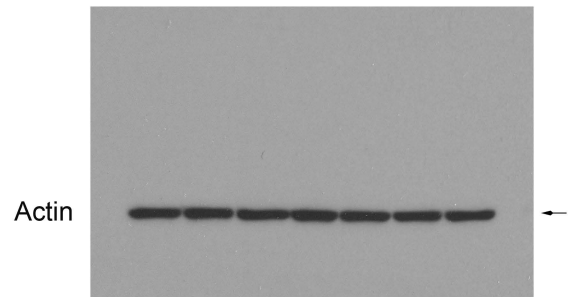

Suppl Fig 5D

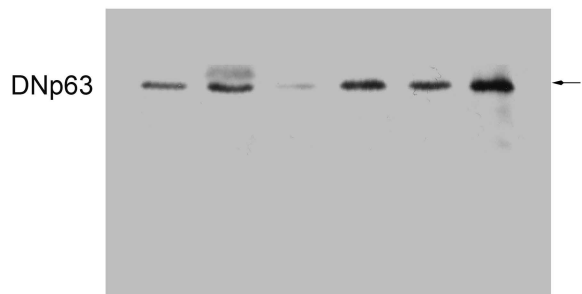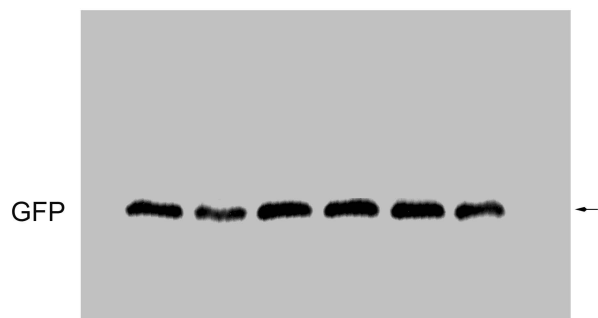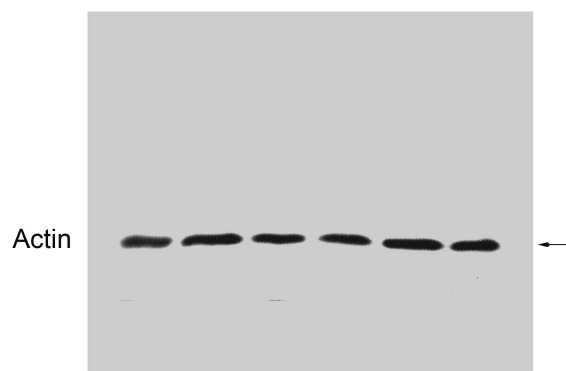

Suppl Fig 5E

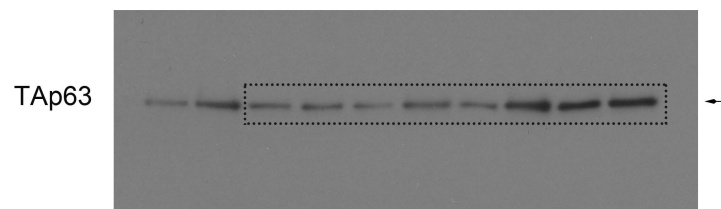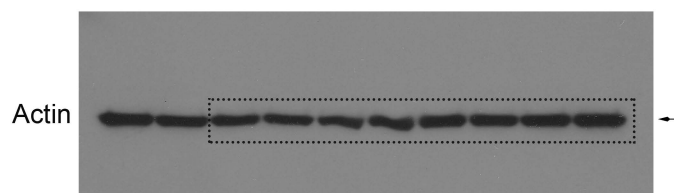

Suppl Fig 6A

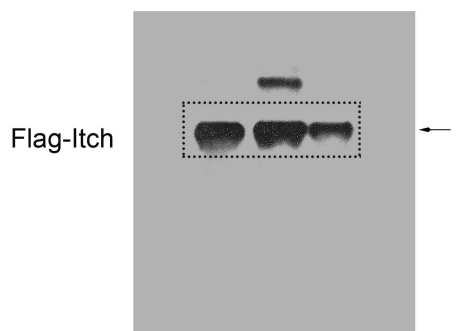

Flag-Irch

TAp63

Suppl Fig 6F

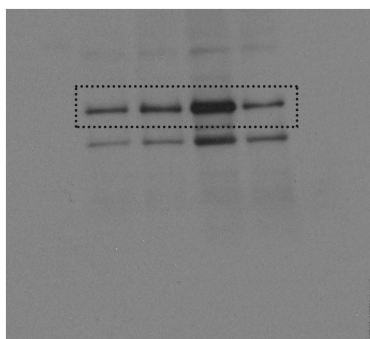

DNp63

Suppl Fig 6G

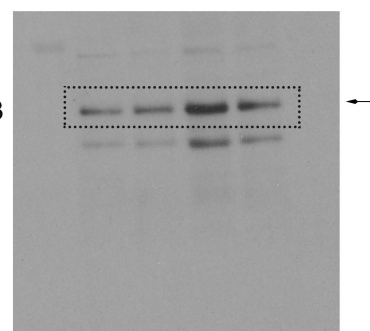

Ago2

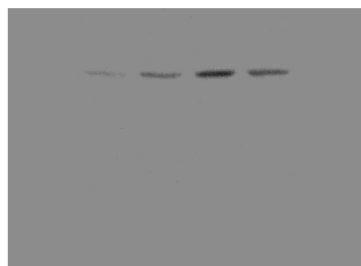

Ago2

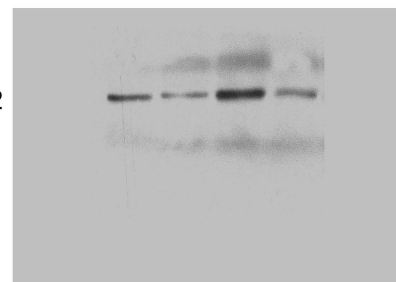

Actin

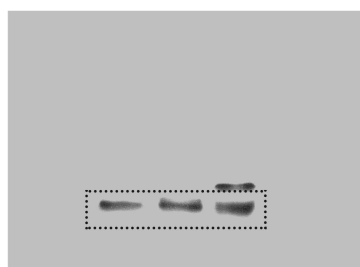

Actin

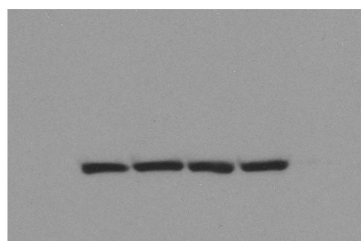

Actin

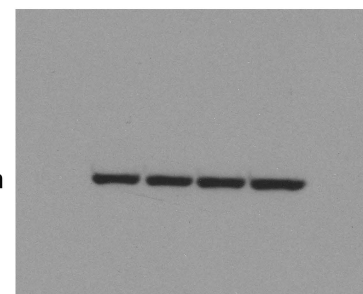

Supplement: 41419_2022_4854_MOESM2_ESM.pdf [file 41419_2022_4854_MOESM2_ESM.pdf]
